# Supplementary material
Source: PubMed Central journal article supplement (PMC5557402)
Supplement: NIHMS893082-supplement-SI.pdf [file NIHMS893082-supplement-SI.pdf]

## SUPPORTING INFORMATION

### **Electron Paramagnetic Resonance Characterization of Three Iron-Sulfur Clusters Present in the Nitrogenase Cofactor Maturase NifB from *Methanocaldococcus infernus***

#### **Authors:**

Jarett Wilcoxon<sup>†,§</sup>, Simon Arragain<sup>‡,§</sup>, Alessandro A. Scandurra<sup>‡</sup>, Emilio Jimenez-Vicente<sup>‡</sup>, Carlos Echavarri-Erasun<sup>‡</sup>, Stephan Pollmann<sup>‡</sup>, R. David Britt<sup>\*†</sup>, Luis M. Rubio<sup>\*‡</sup>

<sup>§</sup>These authors contributed equally to this work

\*Corresponding authors e-mail: lm.rubio@upm.es; rdbritt@ucdavis.edu

#### **Author affiliations:**

<sup>†</sup>Department of Chemistry, University of California, Davis, CA 95616, USA

<sup>‡</sup>Centro de Biotecnología y Genómica de Plantas, Universidad Politécnica de Madrid, Pozuelo de Alarcón, Madrid, Spain.

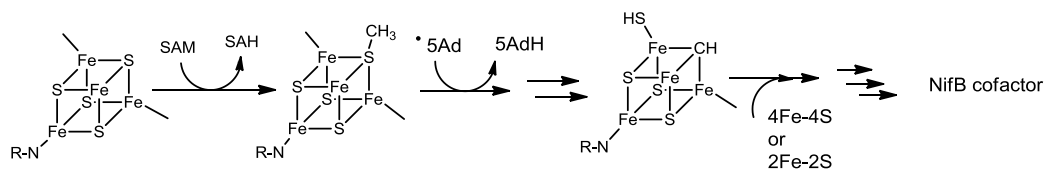

**Scheme S1.** Minimal mechanism of NifB-co synthesis in NifB

**Table S1. Fe and S content of as-isolated and reconstituted *MiNifB***

| <b>WT <i>MiNifB</i> Preparation</b>            | <b>Fe<sup>a</sup></b> | <b>S</b>   |
|------------------------------------------------|-----------------------|------------|
| Anaerobically purified <i>MiNifB</i>           |                       |            |
| As isolated                                    | 3.3 ± 0.1             | 4.0 ± 0.2  |
| Reconstituted with Fe and S                    | 9.2 ± 0.3             | 8.0 ± 0.2  |
| apo- <i>MiNifB</i>                             | < 0.1                 | < 0.1      |
| apo- <i>MiNifB</i> reconstituted with Fe and S | 10 ± 0.2              | 11.2 ± 0.4 |
| Aerobically purified <i>MiNifB</i>             | 0.8 ± 0.1             | 1.2 ± 0.3  |
| <b><i>MiNifB</i> Variant<sup>b</sup></b>       | <b>Fe</b>             | <b>S</b>   |
| As isolated                                    |                       |            |
| SM                                             | 3.3 ± 0.3             | 4.5 ± 0.4  |
| AM                                             | 5.3 ± 0.4             | 6.3 ± 0.1  |
| DM                                             | 2.6 ± 0.2             | 3.5 ± 0.3  |
| Reconstituted with Fe and S                    |                       |            |
| SM                                             | 6.1 ± 0.3             | 7.4 ± 0.4  |
| AM                                             | 5.5 ± 0.2             | 6.4 ± 0.2  |
| DM                                             | 4.6 ± 0.4             | 5.5 ± 0.3  |

<sup>a</sup> Data represent mean ± SD.

<sup>b</sup> Proteins purified under anaerobic conditions

**Table S2. Estimated molecular weights of WT *MiNifB* and the site-directed variants AM, SM and DM.** Table includes the molecular weight standards used to calibrate the Superdex 200 used for size exclusion chromatography.

| <b>Sample</b>                   | <b>Elution volume (ml)</b> | <b>Kav</b> | <b>Measured MW (Da)<sup>a</sup></b> | <b>Theoretical MW (Da)</b> | <b>Probable oligomeric state</b> |
|---------------------------------|----------------------------|------------|-------------------------------------|----------------------------|----------------------------------|
| <b>Aprotenin</b>                | 103.75                     | 0.7930     | 6,843                               | 6,500                      |                                  |
| <b>Ribonuclease A</b>           | 95.21                      | 0.6843     | 13,559                              | 13,700                     |                                  |
| <b>Carbonic anhydrase</b>       | 87.27                      | 0.5832     | 25,613                              | 29,000                     |                                  |
| <b>Ovalbumin</b>                | 78.71                      | 0.4742     | 50,849                              | 43,000                     |                                  |
| <b>Conalbumin</b>               | 74.74                      | 0.4237     | 69,865                              | 75,000                     |                                  |
| <b><i>MiNifB</i> WT</b>         | 85.29                      | 0.5581     | 29,995                              | 37,543                     | monomer                          |
| <b><i>MiNifB</i> SM variant</b> | 83.59                      | 0.5364     | 34,383                              | 37,446                     | monomer                          |
| <b><i>MiNifB</i> AM variant</b> | 85.25                      | 0.5575     | 30,108                              | 37,478                     | monomer                          |
| <b><i>MiNifB</i> DM variant</b> | 85.30                      | 0.5582     | 29,976                              | 37,382                     | monomer                          |

<sup>a</sup> Kav= 2.1967-0.366 \* log MW; R<sup>2</sup> = 0.989. Column Geometric volume = 120 ml. Column void volume = 41.46 ml.

**Table S3. EPR Simulation Values**

|     | $g_1$      | $g_2$      | $g_3$      | $g_{av}$   |            |            |            |            |            |  |
|-----|------------|------------|------------|------------|------------|------------|------------|------------|------------|--|
| RS  | 2.038      | 1.931      | 1.916      | 1.962      |            |            |            |            |            |  |
| AC1 | 2.062      | 1.917      | 1.875      | 1.951      |            |            |            |            |            |  |
| AC2 | 2.039      | 1.923      | 1.886      | 1.949      |            |            |            |            |            |  |
| ACx | 2.058      | 1.985      | 1.909      | 1.984      |            |            |            |            |            |  |
| WT  |            |            |            |            |            |            |            |            |            |  |
|     | $\sigma_1$ | $\sigma_2$ | $\sigma_3$ |            |            |            |            |            |            |  |
| RS  | 0.028      | 0.015      | 0.04       |            |            |            |            |            |            |  |
| AC1 | 0.015      | 0.015      | 0.018      |            |            |            |            |            |            |  |
| AC2 | 0.03       | 0.03       | 0.05       |            |            |            |            |            |            |  |
| ACx | -          | -          | -          |            |            |            |            |            |            |  |
| AM  |            |            | SM         |            |            | DM         |            |            |            |  |
|     | $\sigma_1$ | $\sigma_2$ | $\sigma_3$ | $\sigma_1$ | $\sigma_2$ | $\sigma_3$ | $\sigma_1$ | $\sigma_2$ | $\sigma_3$ |  |
| RS  | 0.028      | 0.018      | 0.04       | -          | -          | -          | -          | -          | -          |  |
| AC1 | -          | -          | -          | 0.025      | 0.018      | 0.018      | -          | -          | -          |  |
| AC2 | 0.03       | 0.04       | 0.08       | 0.03       | 0.03       | 0.08       | 0.03       | 0.04       | 0.08       |  |
| ACx | -          | -          | -          | 0.017      | 0.018      | 0.03       | -          | -          | -          |  |

**Table S4. Spin quantitation of *MiNifB* variants in the absence or presence of SAM**

|    | <b>-SAM (<math>\mu\text{M}</math>)</b> | <b>+SAM (<math>\mu\text{M}</math>)</b> |
|----|----------------------------------------|----------------------------------------|
| WT | 52                                     | 111                                    |
| SM | 65                                     | 82                                     |
| AM | 66                                     | 92                                     |
| DM | 53                                     | 59                                     |

**Table S5. NifB amino acid sequences used to determine strictly conserved residues**

| <b>Entry</b> | <b>Organism</b>                                                                                                  | <b>Sequence length<br/>(Amino acids)</b> |
|--------------|------------------------------------------------------------------------------------------------------------------|------------------------------------------|
| P10390       | <i>Klebsiella pneumoniae</i>                                                                                     | 468                                      |
| P17434       | <i>Rhodobacter capsulatus</i>                                                                                    | 452                                      |
| P27714       | <i>Herbaspirillum seropedicae</i>                                                                                | 525                                      |
| P24427       | <i>Rhizobium leguminosarum</i>                                                                                   | 490                                      |
| P11067       | <i>Azotobacter vinelandii</i>                                                                                    | 502                                      |
| P46044       | <i>Frankia alni</i>                                                                                              | 510                                      |
| Q43883       | <i>Trichormus azollae</i><br>( <i>Anabaena azollae</i> )                                                         | 475                                      |
| P06770       | <i>Bradyrhizobium japonicum</i> (strain USDA 110)                                                                | 499                                      |
| P20627       | <i>Nostoc</i> sp. (strain PCC 7120 / UTEX 2576)                                                                  | 475                                      |
| Q53205       | <i>Rhizobium</i> sp. (strain NGR234)                                                                             | 493                                      |
| P09824       | <i>Rhizobium meliloti</i> (strain 1021)                                                                          | 490                                      |
| Q7MRF5       | <i>Wolinella succinogenes</i>                                                                                    | 449                                      |
| B6IXL5       | <i>Rhodospirillum centenum</i> (strain ATCC 51521 / SW)                                                          | 492                                      |
| D5ANH7       | <i>Rhodobacter capsulatus</i> (strain ATCC BAA-309 / NBRC 16581 / SB1003)                                        | 497                                      |
| B5YH11       | <i>Thermodesulfobacterium yellowstonii</i> (strain ATCC 51303 / DSM 11347 / YP87)                                | 293                                      |
| A0B690       | <i>Methanosaeta thermophila</i> (strain DSM 6194 / PT)                                                           | 299                                      |
| D5VRM1       | <i>Methanocaldococcus infernus</i> (strain DSM 11812 / JCM 15783 / ME)                                           | 302                                      |
| A6UUJ9       | <i>Methanococcus aeolicus</i> (strain Nankai-3 / ATCC BAA-1280)                                                  | 318                                      |
| Q58493       | <i>Methanocaldococcus jannaschii</i> (strain ATCC 43067 / DSM 2661 / JAL-1 / JCM 10045 / NBRC 100440)            | 300                                      |
| Q8TIF7       | <i>Methanosarcina acetivorans</i> (strain ATCC 35395 / DSM 2834 / JCM 12185 / C2A)                               | 323                                      |
| Q6LZH0       | <i>Methanococcus maripaludis</i> (strain S2 / LL)                                                                | 297                                      |
| O27899       | <i>Methanothermobacter thermautotrophicus</i> (strain ATCC 29096 / DSM 1053 / JCM 10044 / NBRC 100330 / Delta H) | 288                                      |
| Q46G74       | <i>Methanosarcina barkeri</i> (strain Fusaro / DSM 804)                                                          | 321                                      |
| Q8PYU4       | <i>Methanosarcina mazei</i> (strain ATCC BAA-159/ DSM 3647 / Goe1 / Go1 / JCM 11833 / OCM 88)                    | 328                                      |
| B3EH81       | <i>Chlorobium limicola</i> (strain DSM 245 / NBRC 103803)                                                        | 424                                      |
| A0LH03       | <i>Syntrophobacter fumaroxidans</i> (strain DSM 10017 / MPOB)                                                    | 423                                      |
| Q72WT2       | <i>Desulfobacterium vulgaris</i> (strain Hildenborough / ATCC 29579 / NCIMB 8303)                                | 514                                      |
| A4J8B5       | <i>Desulfotomaculum reducens</i> (strain MI-1)                                                                   | 299                                      |
| A6TTX6       | <i>Alkaliphilus metalliredigens</i> (strain QYMF)                                                                | 415                                      |
| D6Z0A8       | <i>Desulfurivibrio alkaliphilus</i> (strain DSM 19089 / UNIQEM U267 / AHT2)                                      | 424                                      |
| C0GKD1       | <i>Dethiobacter alkaliphilus</i> AHT 1                                                                           | 418                                      |
| A5N6Z7       | <i>Clostridium kluyveri</i> (strain ATCC 8527 / DSM 555 / NCIMB 10680)                                           | 423                                      |
| Q44481       | <i>Anabaena variabilis</i>                                                                                       | 484                                      |
| A1KYD1       | <i>Cyanothece</i> sp. (strain ATCC 51142)                                                                        | 490                                      |
| B5ER81       | <i>Acidithiobacillus ferrooxidans</i> (strain ATCC 53993)                                                        | 522                                      |
| A8IJJ5       | <i>Azorhizobium caulinodans</i> (strain ATCC 43989 / DSM 5975 / ORS 571)                                         | 519                                      |
| Q6N0X9       | <i>Rhodopseudomonas palustris</i> (strain ATCC BAA-98 / CGA009)                                                  | 518                                      |
| Q2J1J1       | <i>Rhodopseudomonas palustris</i> (strain HaA2)                                                                  | 518                                      |
| G7DEY1       | <i>Bradyrhizobium japonicum</i> USDA 6                                                                           | 527                                      |
| B2JYC0       | <i>Burkholderia phymatum</i> (strain DSM 17167 / STM815)                                                         | 535                                      |
| A4WRX8       | <i>Rhodobacter sphaeroides</i> (strain ATCC 17025 / ATH 2.4.3)                                                   | 491                                      |
| A6UMF6       | <i>Sinorhizobium medicae</i> (strain WSM419)                                                                     | 490                                      |

**Strictly conserved NifB residues.** *M. infernus* NifB (*MiNifB*) amino acid sequence showing in **Bold** those amino acid residues that are conserved in all 42 NifB sequences. Regions where deletion variants were generated are underlined.

MEKMSKFSHLLKA**HPC**FNEKVHDKYGR**VHLPV**APR**CNI**ACKF**CKR**SVSKE**CCEHR**PGVSLG**V**LKPEDVEDY  
LKKILKEMPNIKVVGI**AGPG**DSLFNKE**TF**FETLKIIDEKFPNLIK**C**IST**NG**LLLLSKYYKDLANLNVRTI**TVT**  
V**NA**IKPEILEKIVDWVYYDKKLYRGL**E**GAKLLIEK**Q**IEG**I**KKASEEDFI**K**INTVLIPEI**N**MDHVVEIAKF  
FKDYAYV**QNI**IPLIPQYKMKELRAP**T**C**E**EIKKVRKE**C**EKYIPQFRA**CGQ****CR**ADAVGL**I**KEKELLKEFFKEK  
NKEKNIKLEVF**DL**KHFSH



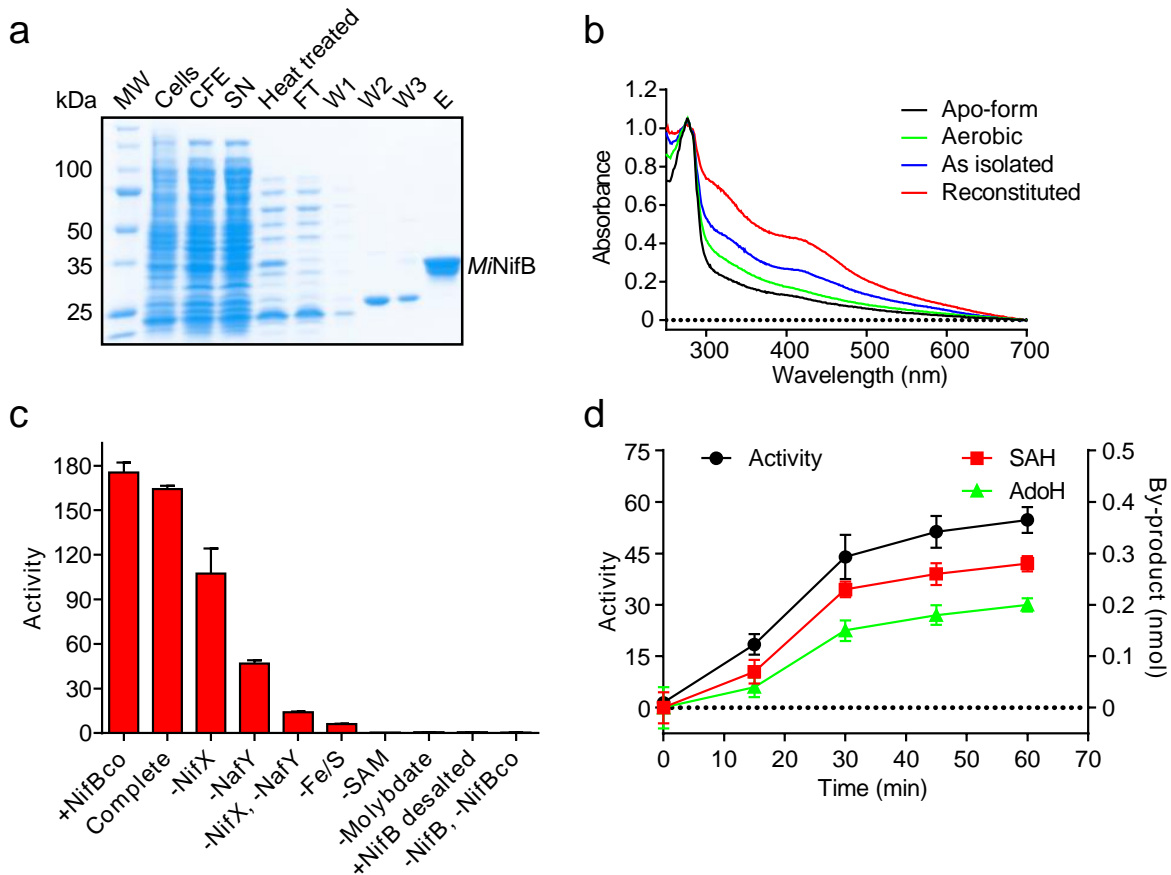

**Figure S1. Biochemical characterization of *MiNifB*.** (a) SDS-PAGE analysis of *MiNifB* purification steps. CFE, cell-free extract; SN, supernatant after removing cell debris; Heat treated, fraction obtained after heating the SN at 75°C for 30 min to precipitate most *E. coli* proteins; W1-3, 30-100 mM imidazole washing fractions; E, 250 mM imidazole eluted fraction containing pure *MiNifB*. (b) UV-visible spectra of anaerobically as-isolated *MiNifB* (blue, 19.9  $\mu$ M), aerobically as-isolated *MiNifB* (green, 19.9  $\mu$ M), [Fe-S] cluster stripped apo-*MiNifB* (black, 21.9  $\mu$ M), and [Fe-S] cluster reconstituted *MiNifB* (red, 13  $\mu$ M). (c) Protein and substrate requirements for *MiNifB*-dependent *in vitro* reconstitution of apo-NifDK. Assays consisted of a 60°C NifB activity phase (that in the complete version contained Fe, S, SAM, DTH, and *MiNifB*) followed by a 30°C FeMo-co synthesis and apo-NifDK reconstitution phase (that in the complete version contained Mo, homocitrate, DTH, NifX, apo-NifEN, NifH, NafY, and apo-NifDK). Detailed assay conditions are described in the Methods Section. A reaction containing NifB-co in place of *MiNifB* (+NifB-co) was carried out as control of pathway functionality downstream NifB. Protein and substrate requirements were analyzed by removing one or more substrates/proteins at a time from the reaction mixtures, as indicated in the x-axis. (d) Time course of SAH and AdoH by-product formation during *MiNifB*-dependent FeMo-co synthesis and apo-NifDK reconstitution. For (c) and (d) activity refers to nmol ethylene formed per min and mg of NifDK. Data are the mean  $\pm$  SD of at least two independent experiments.

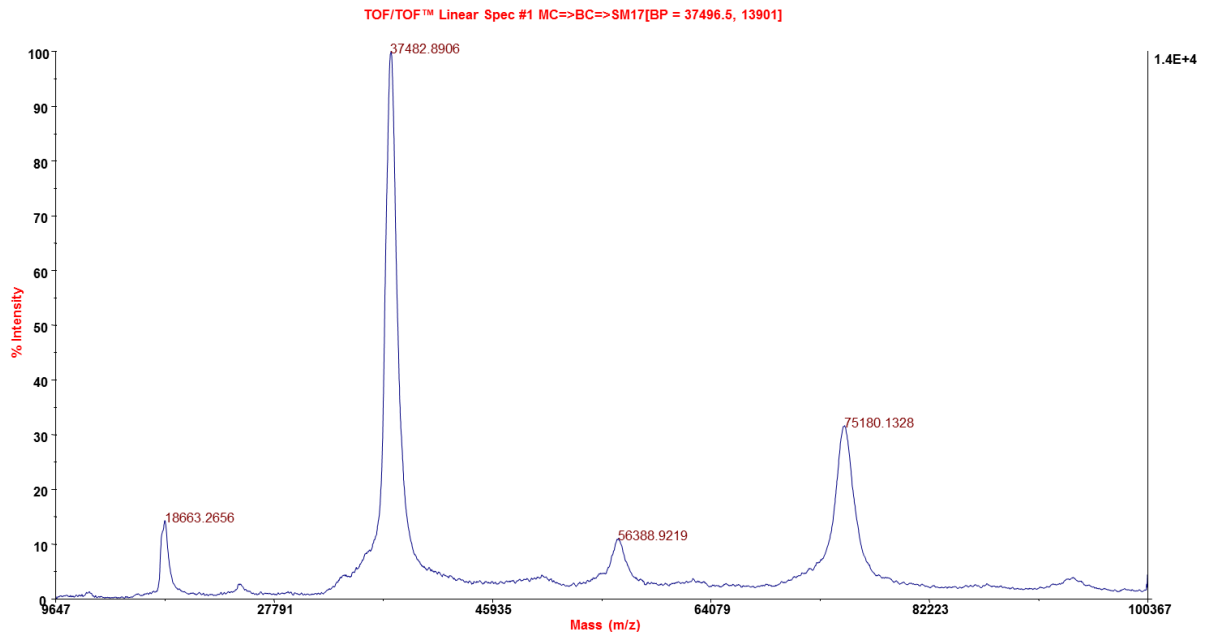

**Figure S2. TOF/TOF analysis of *MiNifB*.** Analysis was carried out by using a 4800 Proteomics Analyzer. As-isolated *MiNifB* yielded a main peak corresponding to a molecular weight of 37,483 Da and a second peak corresponding to a molecular weight of 75,180 Da that could account for a NifB dimer.

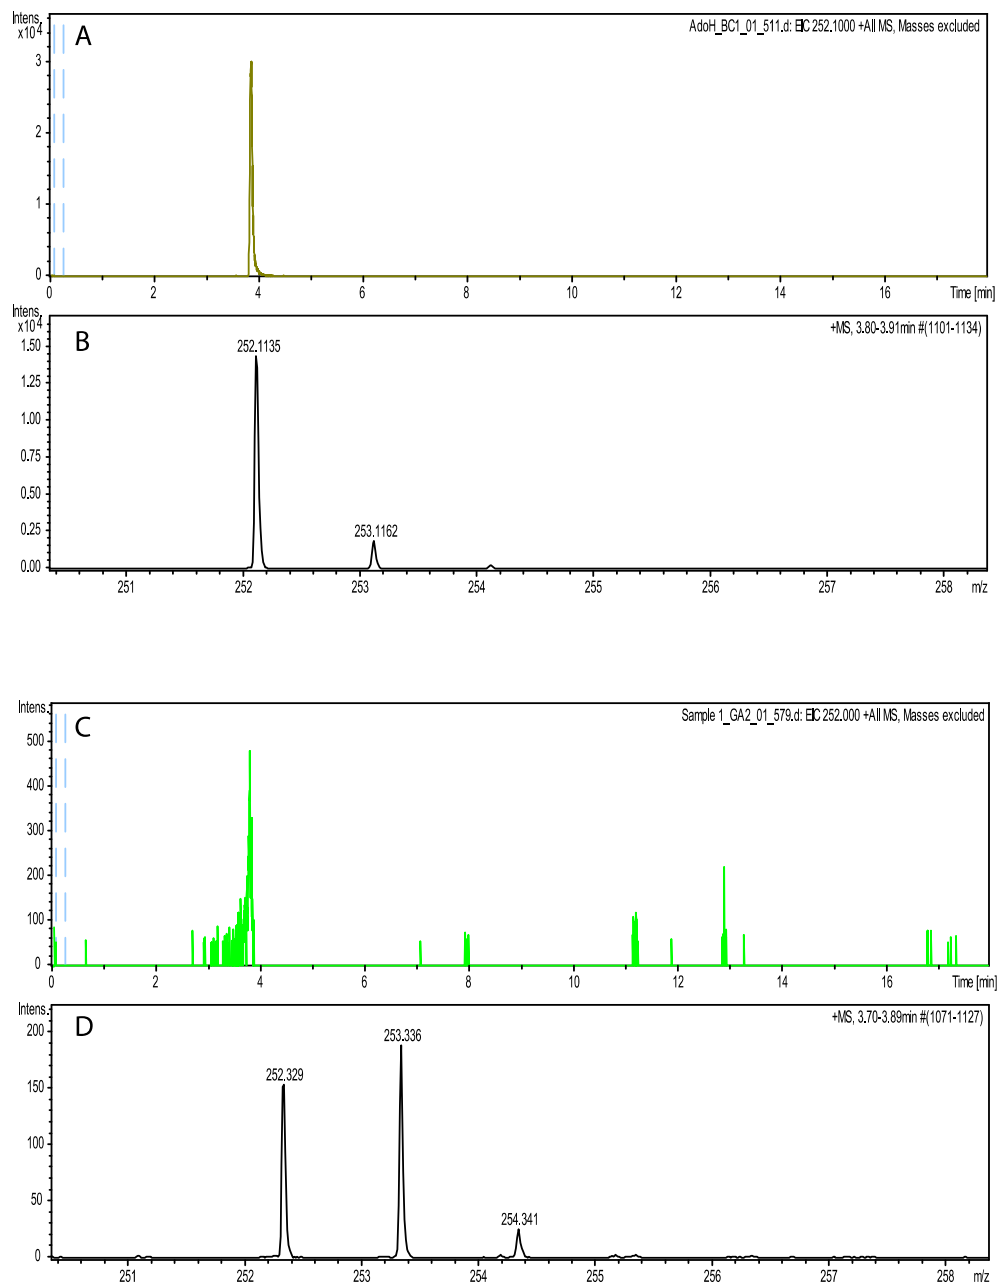

**Figure S3:** Electrospray Ionization Mass Spectrometry (ESI-MS) analysis showing the shift in  $m/z$  253 abundance between the 5'-dAdoH control and 5'-dAdoD generated by incubating *MiNifB* with  $CD_3$ -SAM. 5'-dAdoH elution profile (A) and MS analysis (B). Panel (C) shows the products formed by incubation of *MiNifB* with  $CD_3$ -SAM. (D) MS analysis of the peak eluted at 3.8 min corresponding to 5'-dAdoD.

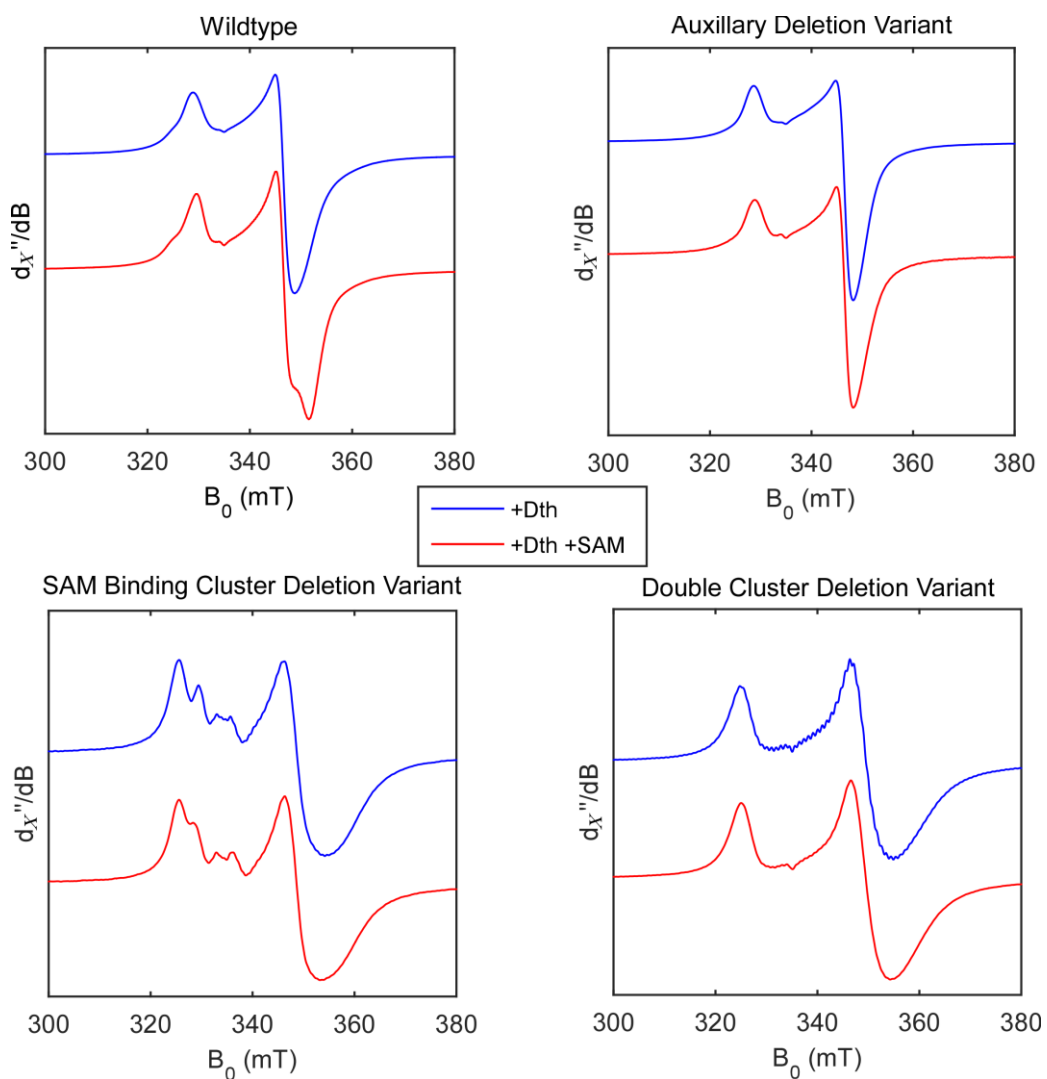

**Figure S4. EPR spectra of [Fe-S] clusters reconstituted *MiNifB* variants.** X-band CW EPR measurements of *MiNifB* protein samples prepared anaerobically with 10 mM DTH in the absence (Blue) or Presence (Red) of 3 mM SAM. **Top Left:** Wild type *MiNifB* **Top Right:** Auxillary cluster substituted variant (AM); **Bottom Left:** SAM Binding cluster substituted variant (SM); **Bottom Right:** Double cluster substituted variant (DM). Typical conditions for recording spectra were 9.40 GHz microwave frequency, 1 mW power, 10 G modulation amplitude, and temperature of 15K.

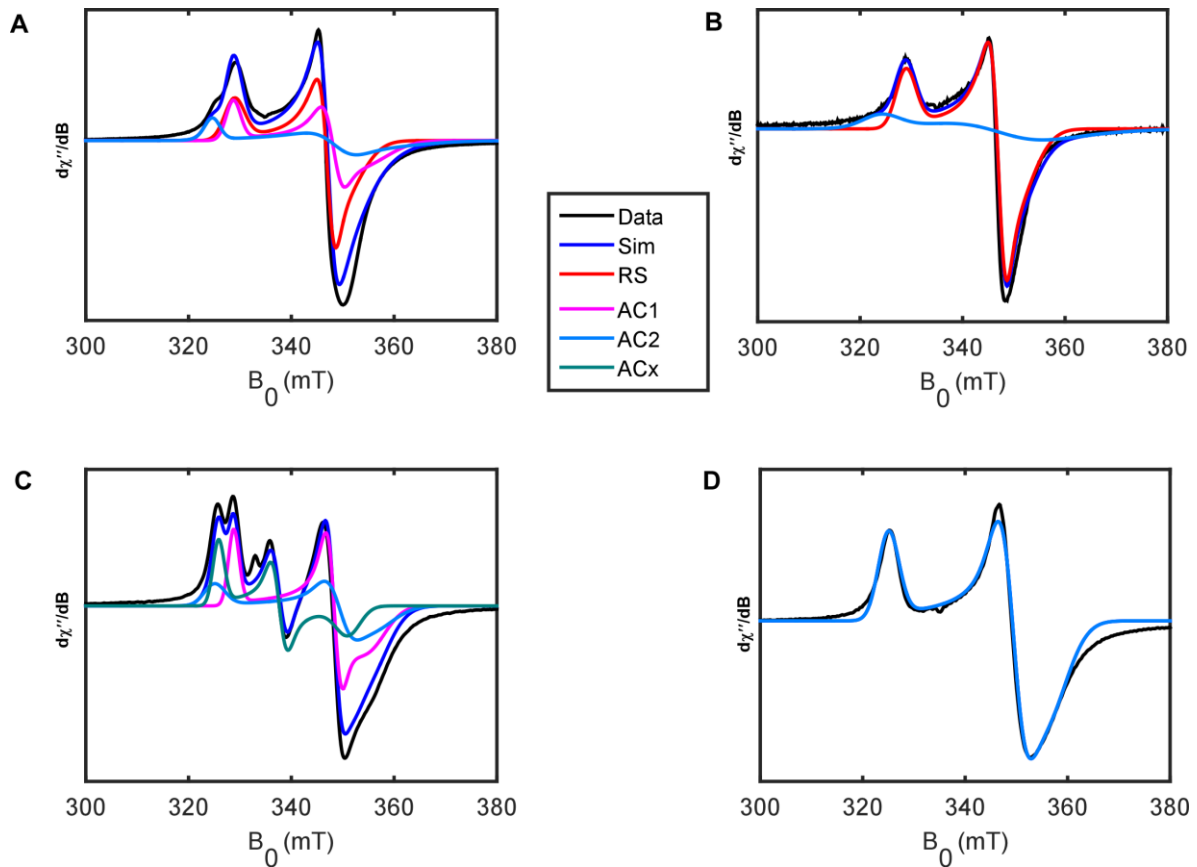

**Figure S5. Components of simulations for [Fe-S] cluster reconstituted *MiNifB*.** X-band CW EPR measurements of *MiNifB* protein samples prepared anaerobically with 10 mM DTH and frozen in an acetone/dry ice bath. (A) WT (274  $\mu\text{M}$ ), (B) AM (159  $\mu\text{M}$ ), (C) SM (159  $\mu\text{M}$ ), and (D) DM (252  $\mu\text{M}$ ). Data are presented in Black with composite spectral simulations in Blue for the WT *MiNifB* and each of the variants. Contributions of each of the individual component clusters are included with RS (Red), AC1 (Fuchsia), AC2 (Light Blue) and degradation cluster, ACx, (Dark Green). Typical conditions for recording spectra were 9.40 GHz microwave frequency, 1 mW power, 5G modulation amplitude, and temperature of 15K.

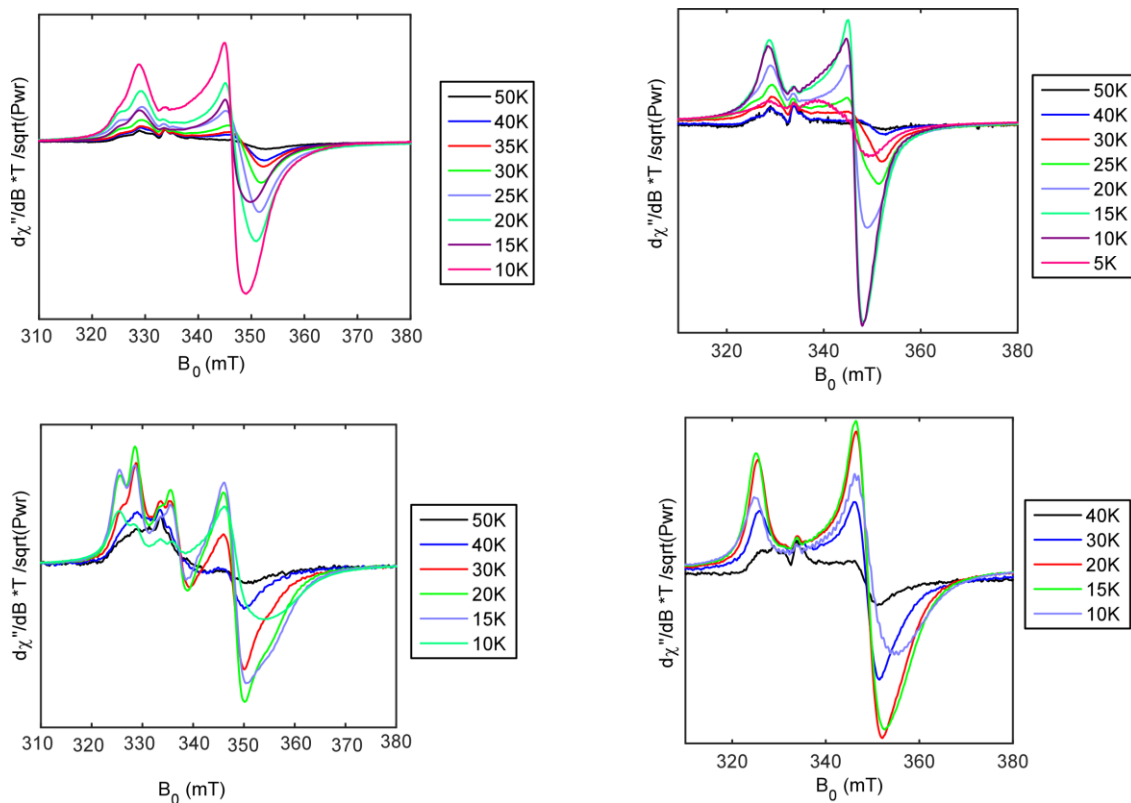

**Figure S6. Temperature dependence and spectral subtractions of WT and site-directed variants of *MiNifB*.** All *MiNifB* samples were reduced with 10 mM DTH. **(Top Left)** Temperature dependence of 274  $\mu\text{M}$  WT *MiNifB*. **(Top Right)** Temperature dependence of 159  $\mu\text{M}$  AM *MiNifB*. **(Bottom Left)** Temperature dependence of 159  $\mu\text{M}$  SM *MiNifB*. **(Bottom Right)** Temperature dependence of 252  $\mu\text{M}$  DM *MiNifB*. Typical conditions for recording spectra are 9.40 GHz microwave frequency, 1 mW power, and 5G modulation amplitude. Spectra were recorded at various temperatures indicated to the right of each panel.

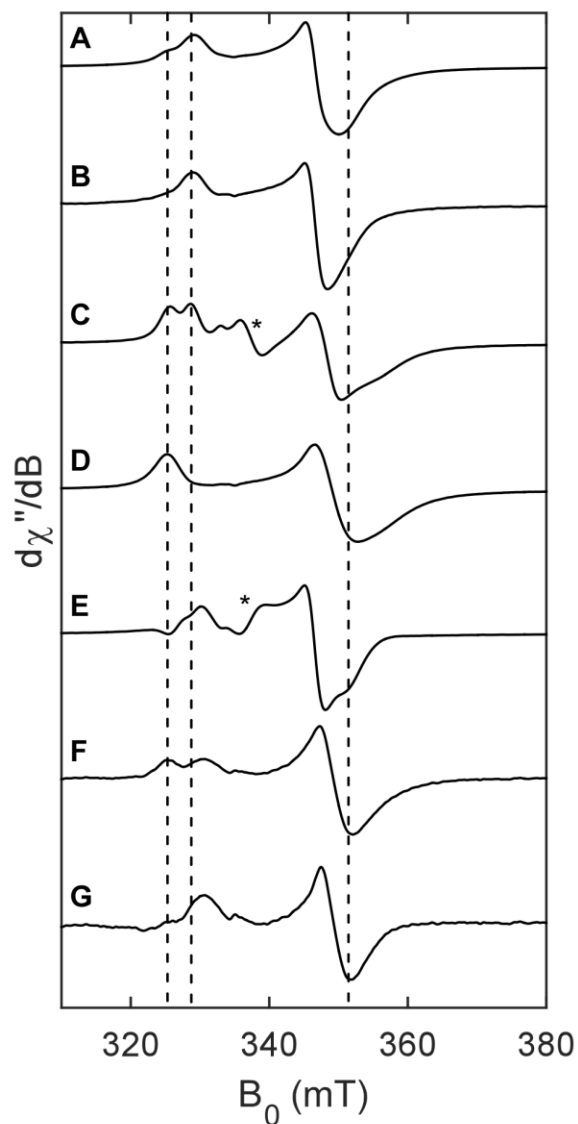

**Figure S7. Spectral subtractions of WT *MiNifB* and variants utilized in determining the clusters present by differences in the spectral composition of the variants. (A) WT *MiNifB*; (B) AM variant; (C) SM variant; (D) DM variant; (E) WT minus AM; (F) WT minus SM; (G) Difference spectrum F minus DM to remove unsubtracted component and highlight the EPR signal from AC1 cluster. Asterisk marks  $g_2$  of ACx degradation cluster. Dashed lines are included to indicate defining  $g_1$  and  $g_3$  spectral features used in deconvolution. Typical conditions for recording spectra are 9.40 GHz microwave frequency, 1 mW power, 5G modulation amplitude, and a temperature of 15 K.**

**Figure S8. Codon optimized and amino acid sequences of WT *MiNifB* and site-directed variants generated in this work**

**Codon optimized sequence (*E. coli*) of *Methanocaldococcus infernus* *MiNifB* (metin\_0554):**

CATATGGAAAAAATGTCAAATTTCTCGCATCTGCTGAAAGCGCACCCGTGCTTCAACGAAAAAGTC  
CACGATAAATACGGTTCGCGTCCACCTGCCGGTTGCACCGCGTTGCAACATCGCTTGCAAATTTTGT  
AAACGCAGCGTCTCTAAAGAATGCTGTGAACATCGTCCGGGCGTCTCACTGGGTGTGCTGAAACCG  
GAAGATGTGGAAGACTACCTGAAGAAAATTTCTGAAAGAAATGCCGAACATCAAAGTGGTTGGCATT  
GCGGGCCCGGGTGATTCGCTGTTTAATAAAGAAACGTTGAAACCCTGAAAATTATCGACGAAAAA  
TTCCCGAACCTGATTAATGTATCAGTACGAATGGTCTGCTGCTGTCCAAATATTACAAAGATCTG  
GCAAACCTGAATGTTTCGCACCATCACGGTTACCGTCAACGCTATTAAACCGGAAATCCTGGAAAAA  
ATTGTGGATTGGGTTTATTACGACAAAAAACTGTACCGTGGCCTGGAAGGTGCGAAACTGCTGATC  
GAAAAACAGATCGAAGGCATCAAAAAAGCCTCTGAAGAAGACTTCATCATCAAAAATCAACACGGTC  
CTGATTCGGGAAATCAATATGGATCACGTCGTGGAATTTGCGAAATTTTTCAAAGACTATGCCTAC  
GTTTTCAGAAATATTATCCCGCTGATTCGGCAATATAAAATGAAAGAAGTGCAGCACCACCTGCGAA  
GAAATCAAAAAAGTGCCTAAAGAATGTGAAAAATACATTCCCGCAGTTTCGCGCCTGTGGTCAATGT  
CGTGCCGATGCCGTTGGTCTGATTAAGAAAAAGAAGTCTGAAAGAATTTTTCAAAGAAAAAGAAT  
AAAGAAAAGAACATTAAGTGGAAAGTCTTTGACCTGAAACACTTCTCCCACTGACTCGAG

***MiNifB* wild-type (WT) amino acid sequence:**

MEKMSKFSHLLKAHPCFNEKVHDKYGRVHLPVAPRCNIACKFCRVSVSKECCEHRPGVSLGVLKPE  
DVEDYLKILKEMPNIKVVGIAGPGDSLNFNKFETLKI IDEKFPNLIKICISTNGLLLSKYYKDLA  
NLNVRTITVTVNAIKPEILEKIVDWVYYDKKLYRGLEGAKLLIEKQIEGICKASEEDFI IKINTVL  
IPEINMDHVVEIAKFFKDYAYVQNI I PLIPQYKMKELRAPTC EEIKKVRKECEKYI PQFRACGQCR  
ADAVGLIKEKELLKEFFKEKNKEKNIKLEVFDLKHFSH

**Codon optimized sequence of the C36A/C40A/C43A (SM) *MiNifB* variant:**

CATATGGAAAAAATGTCAAATTTCTCGCATCTGCTGAAAGCGCACCCGTGCTTCAACGAAAAAGTC  
CACGATAAATACGGTTCGCGTCCACCTGCCGGTTGCACCGCGTGCCAACATCGCTGCCAAATTTGCT  
AAACGCAGCGTCTCTAAAGAATGCTGTGAACATCGTCCGGGCGTCTCACTGGGTGTGCTGAAACCG  
GAAGATGTGGAAGACTACCTGAAGAAAATTTCTGAAAGAAATGCCGAACATCAAAGTGGTTGGCATT  
GCGGGCCCGGGTGATTCGCTGTTTAATAAAGAAACGTTGAAACCCTGAAAATTATCGACGAAAAA  
TTCCCGAACCTGATTAATGTATCAGTACGAATGGTCTGCTGCTGTCCAAATATTACAAAGATCTG  
GCAAACCTGAATGTTTCGCACCATCACGGTTACCGTCAACGCTATTAAACCGGAAATCCTGGAAAAA  
ATTGTGGATTGGGTTTATTACGACAAAAAACTGTACCGTGGCCTGGAAGGTGCGAAACTGCTGATC  
GAAAAACAGATCGAAGGCATCAAAAAAGCCTCTGAAGAAGACTTCATCATCAAAAATCAACACGGTC  
CTGATTCGGGAAATCAATATGGATCACGTCGTGGAATTTGCGAAATTTTTCAAAGACTATGCCTAC  
GTTTTCAGAAATATTATCCCGCTGATTCGGCAATATAAAATGAAAGAAGTGCAGCACCACCTGCGAA  
GAAATCAAAAAAGTGCCTAAAGAATGTGAAAAATACATTCCCGCAGTTTCGCGCCTGTGGTCAATGT  
CGTGCCGATGCCGTTGGTCTGATTAAGAAAAAGAAGTCTGAAAGAATTTTTCAAAGAAAAAGAAT  
AAAGAAAAGAACATTAAGTGGAAAGTCTTTGACCTGAAACACTTCTCCCACTGACTCGAG

**Amino acid sequence of *MiNifB* SM variant:**

MEKMSKFSHLLKAHPCFNEKVHDKYGRVHLPVAPRANIAAKFAKRSVSVSKECCEHRPGVSLGVLKPE  
DVEDYLKILKEMPNIKVVGIAGPGDSLNFNKFETLKI IDEKFPNLIKICISTNGLLLSKYYKDLA  
NLNVRTITVTVNAIKPEILEKIVDWVYYDKKLYRGLEGAKLLIEKQIEGICKASEEDFI IKINTVL  
IPEINMDHVVEIAKFFKDYAYVQNI I PLIPQYKMKELRAPTC EEIKKVRKECEKYI PQFRACGQCR  
ADAVGLIKEKELLKEFFKEKNKEKNIKLEVFDLKHFSH

**Codon optimized sequence of the C260A/C263A (AM) *MiNifB* variant:**

CATATGGAAAAAATGTCAAATTTCTCGCATCTGCTGAAAGCGCACCCGTGCTTCAACGAAAAAGTC  
CACGATAAATACGGTTCGCGTCCACCTGCCGGTTGCACCGCGTTGCAACATCGCTTGCAAATTTTGT



AAACGCAGCGTCTCTAAAGAATGCTGTGAACATCGTCCGGGCGTCTCACTGGGTGTGCTGAAACCG  
GAAGATGTGGAAGACTACCTGAAGAAAATTCTGAAAGAAATGCCGAACATCAAAGTGGTTGGCATT  
GCGGGCCCGGGTGATTCGCTGTTAATAAAGAAACGTTGAAACCCTGAAAATTATCGACGAAAAA  
TTCCCGAACCTGATTAATGTATCAGTACGAATGGTCTGCTGCTGTCCAAATATTACAAAGATCTG  
GCAAACCTGAATGTTTCGCACCATCACGGTTACCGTCAACGCTATTAACC GGAAATCCTGGAAAAA  
ATTGTGGATTGGGTTTATTACGACAAAAAAGTACCCTGGCCTGGAAGGTGCGAAACTGCTGATC  
GAAAAACAGATCGAAGGCATCAAAAAAGCCTCTGAAGAAGACTTCATCATCAAAAATCAACACGGTC  
CTGATTCCGGAAATCAATATGGATCACGTCGTGGAAATTGCGAAATTTTTCAAAGACTATGCCTAC  
GTTTTCAGAAATATTATCCCGCTGATTCCGCAATATAAAAATGAAAGAAGTGCAGCACCACCGCTGCGAA  
GAAATCAAAAAAGTGCCTAAAGAATGTGAAAAATACATTCCGCAGTTTCGCGCCGCGGGTCAAGCG  
CGTGCCGATGCCGTTGGTCTGATTAAAGAAAAAGAACTGCTGAAAGAATTTTTCAAAGAAAAAGAAAT  
AAAGAAAAGAACATTAAACTGGAAGTCTTTGACCTGAAACACTTCTCCCACTGACTCGAG

**Amino acid sequence of *MiNifB* AM variant:**

MEKMSKFSHLLKAHPCFNEKVHDKYGRVHLPVAPRCNIACKFCKRSVSKECCEHRPGVSLGVLKPE  
DVEDYLKKILKEMPNIKVVGIAGPGDSL FNKETFETLKI IDEKFPNLIKCI STNGLLLSKYYKDLA  
NLNVRTITVTVNAIKPEILEKIVDWVYYDKKLYRGLGAKLLIEKQIEGIIKKASEEDFI IKINTVL  
IPEINMDHVVEIAKFFKDYAYVQNI I PLIPQYKMKELRAPTCEEIKKVRKECEKYI PQFRAAGQAR  
ADAVGLIKEKELLKEFFKEKNKEKNIKLEVF DLKHFSH

**Codon optimized sequence of the C36A/C40A/C43A/C260A/C263A (DM) *MiNifB* variant:**

CATATGGAAAAAATGTCAAATCTCGCATCTGCTGAAAGCGCACCCGTGCTTCAACGAAAAAGTC  
CACGATAAATACGGTTCGCTCCACCTGCCGGTTGCACCGCGTGCGAACATCGCTGCGAAATTTGCG  
AAACGCAGCGTCTCTAAAGAATGCTGTGAACATCGTCCGGGCGTCTCACTGGGTGTGCTGAAACCG  
GAAGATGTGGAAGACTACCTGAAGAAAATTCTGAAAGAAATGCCGAACATCAAAGTGGTTGGCATT  
GCGGGCCCGGGTGATTCGCTGTTAATAAAGAAACGTTGAAACCCTGAAAATTATCGACGAAAAA  
TTCCCGAACCTGATTAATGTATCAGTACGAATGGTCTGCTGCTGTCCAAATATTACAAAGATCTG  
GCAAACCTGAATGTTTCGCACCATCACGGTTACCGTCAACGCTATTAACC GGAAATCCTGGAAAAA  
ATTGTGGATTGGGTTTATTACGACAAAAAAGTACCCTGGCCTGGAAGGTGCGAAACTGCTGATC  
GAAAAACAGATCGAAGGCATCAAAAAAGCCTCTGAAGAAGACTTCATCATCAAAAATCAACACGGTC  
CTGATTCCGGAAATCAATATGGATCACGTCGTGGAAATTGCGAAATTTTTCAAAGACTATGCCTAC  
GTTTTCAGAAATATTATCCCGCTGATTCCGCAATATAAAAATGAAAGAAGTGCAGCACCACCGCTGCGAA  
GAAATCAAAAAAGTGCCTAAAGAATGTGAAAAATACATTCCGCAGTTTCGCGCCGCGGGTCAAGCG  
CGTGCCGATGCCGTTGGTCTGATTAAAGAAAAAGAACTGCTGAAAGAATTTTTCAAAGAAAAAGAAAT  
AAAGAAAAGAACATTAAACTGGAAGTCTTTGACCTGAAACACTTCTCCCACTGACTCGAG

**Amino acid sequence of *MiNifB* DM variant::**

MEKMSKFSHLLKAHPCFNEKVHDKYGRVHLPVAPRANIAAKFAKRSVSKECCEHRPGVSLGVLKPE  
DVEDYLKKILKEMPNIKVVGIAGPGDSL FNKETFETLKI IDEKFPNLIKCI STNGLLLSKYYKDLA  
NLNVRTITVTVNAIKPEILEKIVDWVYYDKKLYRGLGAKLLIEKQIEGIIKKASEEDFI IKINTVL  
IPEINMDHVVEIAKFFKDYAYVQNI I PLIPQYKMKELRAPTCEEIKKVRKECEKYI PQFRAAGQAR  
ADAVGLIKEKELLKEFFKEKNKEKNIKLEVF DLKHFSH
